# Supplementary material for: Hydrogen-based ore-to-part manufacturing of near-net shaped stainless steel
Source: Research Square preprint supplement (doi:10.21203/rs.3.rs-7521801/v1), 2025-09-23
Supplement: Supplementary file 1 [file 82748393bad39c99e1906a1d.docx]

**Supplementary materials**


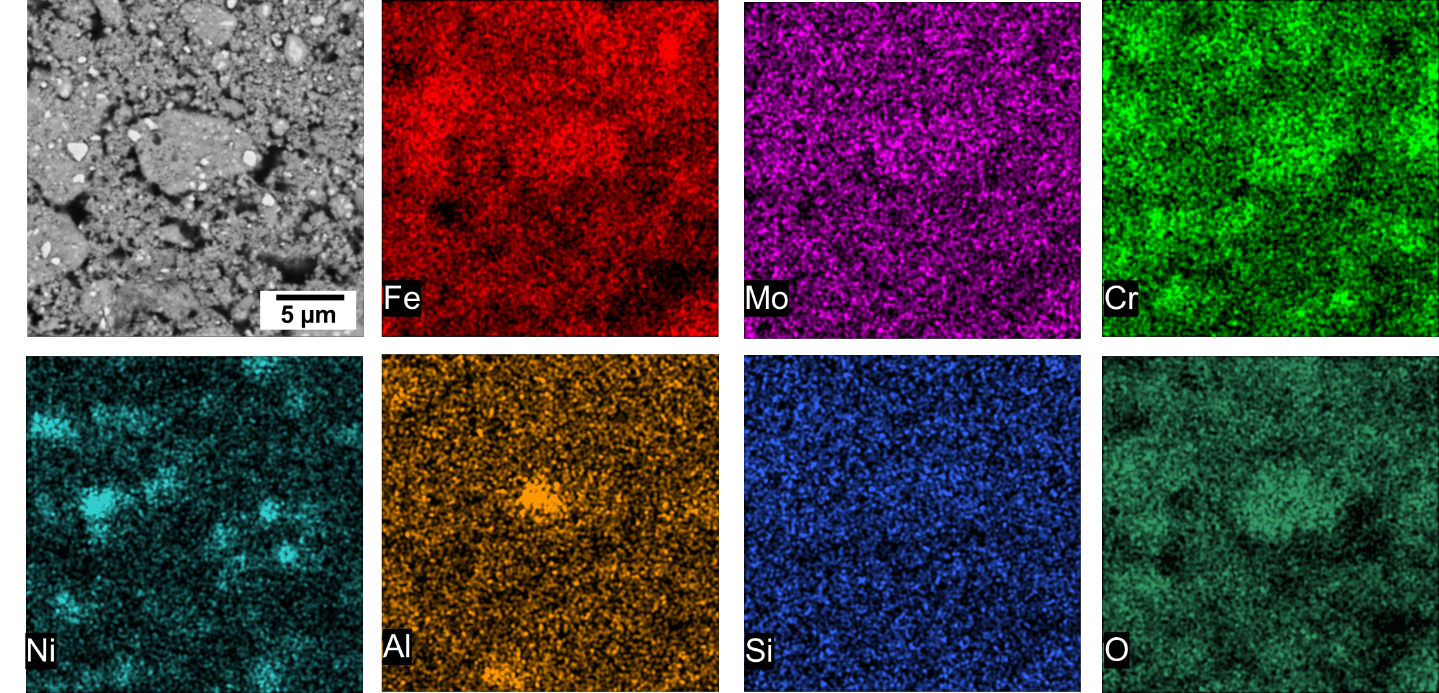


**Fig. S1.** Backscatter electron (BSE)-SEM micrograph of the powder mixture, along with the corresponding EDS elemental maps for Fe, Mo, Cr, Ni, Al, Si, and O. Imaging was taken at an accelerating voltage of 20 kV.


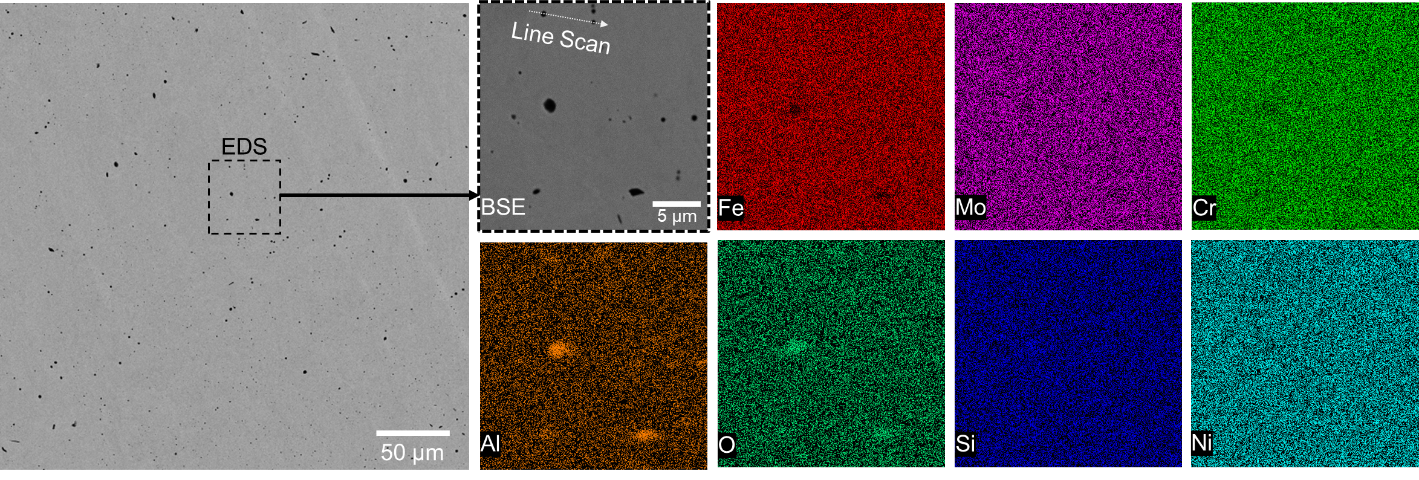


**Fig. S2.** BSE-SEM micrograph and EDS analysis of the cross-sectional area of the gel-cast specimen after H2-based redox. Imaging was taken at an accelerating voltage of 20 kV, showing dense microstructure with coarse Al-rich inclusions (appearing as darker contrast particles).


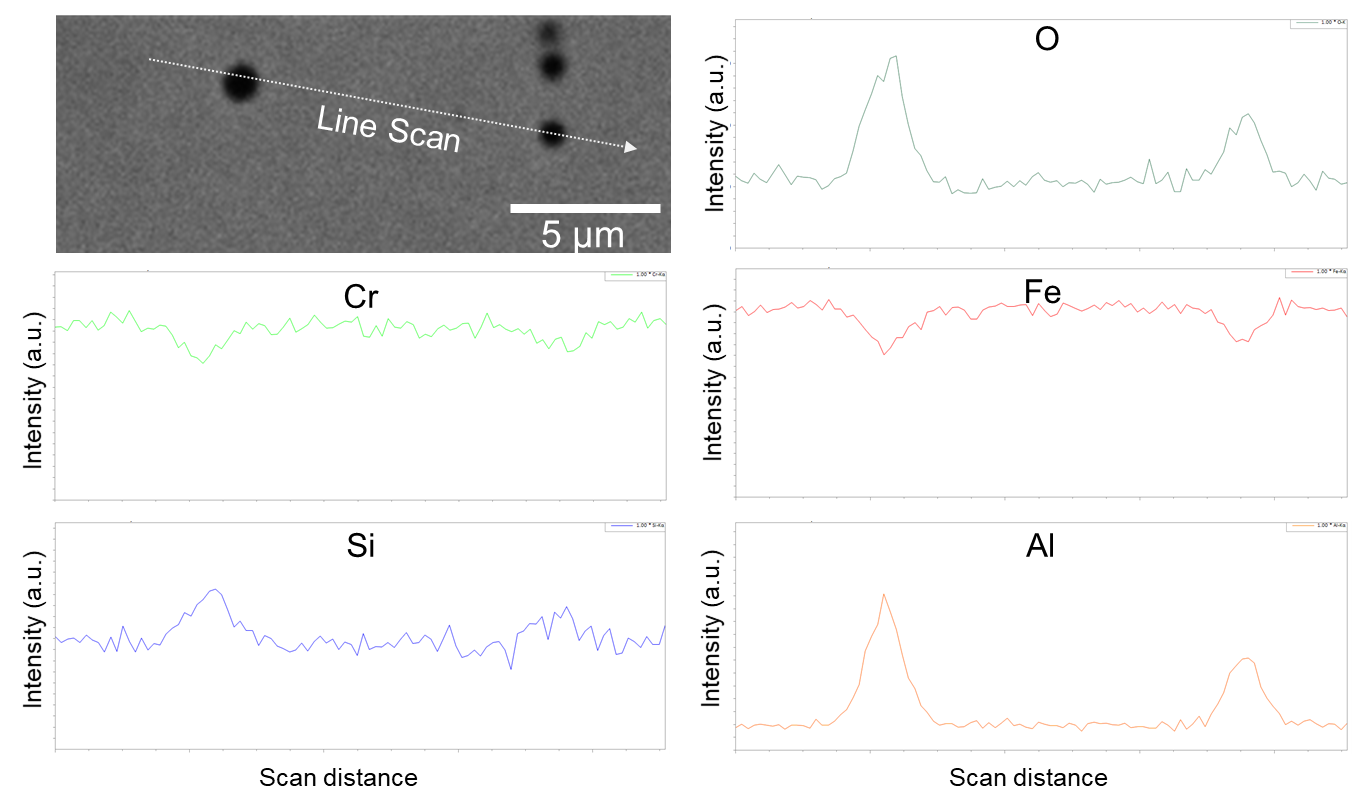


**Fig. S3.** EDS line scan across two submicron-sized inclusions, showing enrichment in Si, Al, and O, along with depletion of Fe and Cr, confirming their identity as gangue oxides ((Si,Al)Oₓ).
